# Supplementary material for: Proteasome dysfunction induces muscle growth defects and protein aggregation
Source: PubMed Central journal article supplement (PMC4265737; doi:10.1242/jcs.150961), 2014-12-15
Supplement: supp_127.24.5204_JCS150961.pdf [file supp_127.24.5204_JCS150961.pdf]

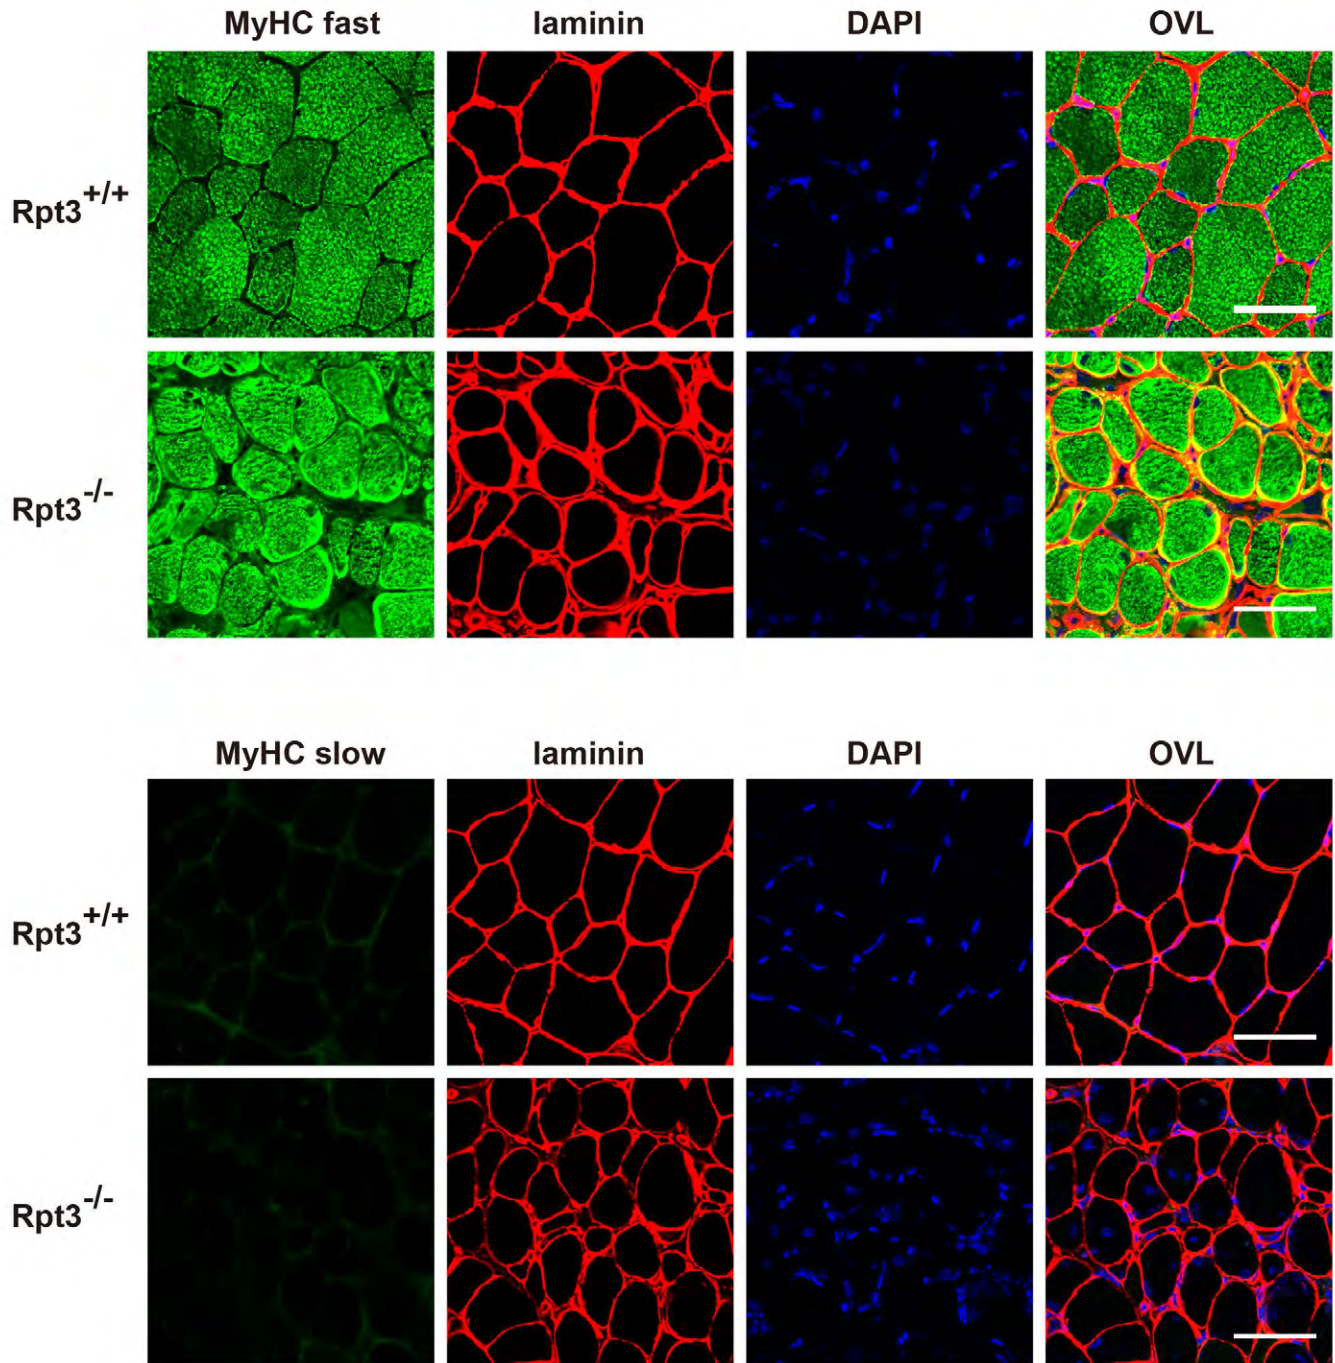

**Supplementary Figure 1.** Immunohistochemical detection of MyHC fast and MyHC slow in Rpt3<sup>+/+</sup> and Rpt3<sup>-/-</sup> mice of the tibialis anterior muscles revealed the muscles contained predominantly MyHC fast fibers. Bar: 50  $\mu$ m.

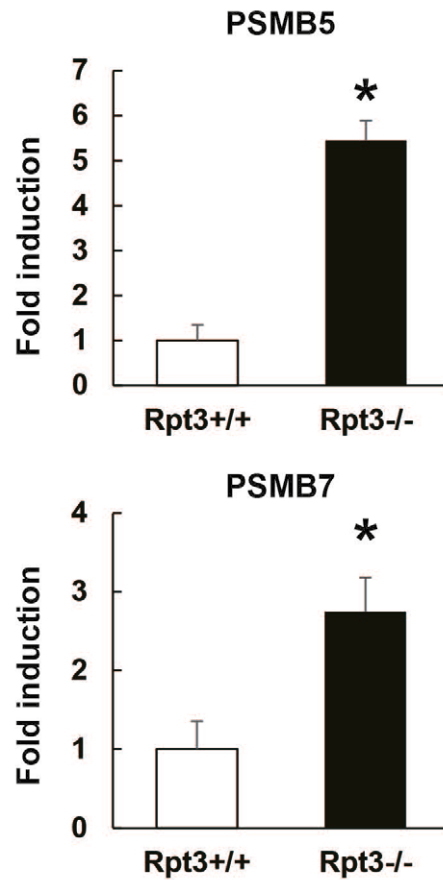

**Supplementary Figure 2.** The proteolytic subunits in the 20S catalytic core: PSMB5 with chymotrypsin-like activity; and PSMB7 with trypsin-like activity. All of the constitutive proteolytic subunits PSMB5, 7 showed increase expression at the mRNA level in Rpt3<sup>-/-</sup> mice at the age of 6 weeks. RNA was extracted from the tibialis anterior muscles, and quantitative PCR analysis was performed in triplicates using specific primers (Supplementary Table 1). Data were normalized to the GAPDH content and expressed as fold increase over levels of Rpt3<sup>+/+</sup> mice. Student's t-test, \* p<0.05 (n=5).

**Supplementary Table 1.** Primers for quantitative PCR used in Figure 5B, 5E, 6B and Supplementary Figure 2.

|                        |                        |                        |                        |
|------------------------|------------------------|------------------------|------------------------|
| Uchl1-F376             | CCCGAAGATAGAGCCAAGTG   | Uchl1-R530             | CCATCGAGCTCGTACAGATG   |
| Gdf15-F643             | CTTGAAGACTTGGGCTGGAG   | Gdf15-R838             | TAAGAACCACCGGGGTGTAG   |
| CathepsinS-F509        | TCAGTGCTCAGAACCTGGTG   | CathepsinS-R664        | ACTTTTCATCCGTGGCTTTG   |
| FBXO32(Atrogin-1)-F531 | ATGCACACTGGTGCAGAGAG   | FBXO32(Atrogin-1)-R698 | TGTAAGCACACAGGCAGGTC   |
| Fbxo2-F522             | CTCCTCCTTCGAGTGGTGTC   | Fbxo2-R693             | CCTGTCCTGTAGCGAACTCC   |
| PSMB9-F412             | ATGCTAATTCGACAGCCCTTTA | PSMB9-R596             | GTGATGGTGACCAGGTAGATGA |
| Pomp-F90               | TCTCCGGAAAGGGTTTTCTT   | Pomp-R326              | TCGTTGCCCTCAAATATC     |
| PSME2-F305             | CCTTGCTCGCTTTGGTTAAG   | PSME2-R540             | CTTGGAAGCCTTGGCTACAG   |
| PSMB5-F160             | ATCGAAATGCTTCACGGAAC   | PSMB5-R395             | CGTTCCTTATTGCGAAGCTC   |
| Fgf9-F364              | GGGGAGCTGTATGGATCAGA   | Fgf9-R589              | CTTTGTCAGGGTCCACTGGT   |
| Sdc4-F262              | AACCACATCCCTGAGAATGC   | Sdc4-R491              | AGGAAAACGGCAAAGAGGAT   |
| PSMB4-F260             | TTATGCGAGTCAACGACAGC   | PSMB4-R494             | CTTCTCCGTCAGCATAGCC    |
| PSMD4-F595             | CTTGGTGCCAGTGACTTTGA   | PSMD4-R749             | GTAGCAATTCCAGCCTCAGC   |
| PSMD5-F306             | CACTCTGTCGCAGATTGGAA   | PSMD5-R474             | GCCAGCCTGGGTTAGTGATA   |
| Vcpip1-F2344           | GATGGACGGCAGTCTATGGT   | Vcpip1-R2580           | AGTGGATGGACCACCTTCTG   |
| PSMB2-F314             | CTGGCTATGACGAGCATGAA   | PSMB2-R503             | TGGAGCTCCTCCAGACACTT   |
| PSMD3-F782             | ACCAGGCTGAGAAGCTGGTA   | PSMD3-R954             | AACAGCTGTGTGCTGTGGAG   |
| PSMD11-F343            | GAATGGGCCAAATCAGAGAA   | PSMD11-R502            | CCACAAAAGGGCTTTATCA    |
| PSMA2-F342             | AGCCTCTGTGATGCAGGAGT   | PSMA2-R520             | GGAAAGTTTTCCCGTTCACA   |
| PSMD13-F815            | TCCAGCTGTTGTGCCTTATG   | PSMD13-R1052           | TCCTTCATCCCCTTGATCTG   |
| PSMB6-F193             | GACAAGCTGACCCCTATCCA   | PSMB6-R397             | TGATGATTCCTGCCATCAGA   |
| PSMC5-F391             | GTGGACCCTTTGGTGTCACT   | PSMC5-R599             | GCCACAATGTCTTCCCAGT    |
| PSMC4-F463             | ACCTCAGACCAGAAGCCAGA   | PSMC4-R693             | CACCACACGGATAAATGCAG   |
| Mstn-F716              | CTGTAACCTTCCCAGGACCA   | Mstn-R912              | TCTTTTGGGTGCGATAATCC   |
| Mbnl1-F181             | AAAGGTCGTTGCTCCAGAGA   | Mbnl1-R378             | GCTTGGTGCAACTGAAAACA   |
| MuRF1-F                | ACCTGCTGGTGGAAAACATC   | MuRF1-R                | CTTCGTGTTCCCTGCACATC   |
| p62-F                  | AGAATGTGGGGAGAGTGTG    | p62-R                  | TCGTCTCCTCCTGAGCAGTT   |
| GAPDH-F                | AACTTTGGCATTGTGGAAGG   | GAPDH-R                | CACATTGGGGGTAGGAACAC   |
| PSMB7-F                | GTGTCGGTGTTCAGCCAC     | PSMB7-R                | TCCGCTTCCAAGACAGCATTC  |

**Supplementary Table 2.** Top 10 networks identified by ingenuity pathway analysis.

|    | Associated Network Functions                                                                                                   | Score |
|----|--------------------------------------------------------------------------------------------------------------------------------|-------|
| 1  | Connective Tissue Disorders, Genetic Disorder, Dermatological Diseases and Conditions<br>Major interactors: TGFbeta1, collagen | 60    |
| 2  | Cellular Development, Embryonic Development, Tissue Development                                                                | 56    |
| 3  | Protein Synthesis, Molecular Transport, Protein Trafficking<br>Major interactors:60S ribosomal subunit, MAP3K14                | 54    |
| 4  | Carbohydrate Metabolism, Small Molecule Biochemistry, Nucleic Acid Metabolism                                                  | 54    |
| 5  | Cell Cycle, Cellular Compromise, Cell Death                                                                                    | 52    |
| 6  | Nucleic Acid Metabolism, Small Molecule Biochemistry, Developmental Disorder                                                   | 52    |
| 7  | Developmental Disorder, Genetic Disorder, Metabolic Disease                                                                    | 51    |
| 8  | Carbohydrate Metabolism, Small Molecule Biochemistry, Cell Signaling                                                           | 50    |
| 9  | Genetic Disorder, Metabolic Disease, Cardiovascular Disease                                                                    | 48    |
| 10 | Cell Death, DNA Replication, Recombination, and Repair, Cell Morphology                                                        | 46    |

**Supplementary Table 3.** KEGG Pathway analysis using the differentially expressed genes.

KEGG\_PATHWAY analysis using the differentially expressed genes in comparison of Rpt3<sup>+/+</sup> with <sup>-/-</sup> mice

| Term                                                            | Count | PValue      | Fold Enrichment | Bonferroni  | Benjamini   | FDR         |
|-----------------------------------------------------------------|-------|-------------|-----------------|-------------|-------------|-------------|
| mmu03050:Proteasome                                             | 25    | 1.76E-08    | 3.368794326     | 3.28E-06    | 3.28E-06    | 2.19E-05    |
| mmu03010:Ribosome                                               | 36    | 5.71E-08    | 2.561797753     | 1.06E-05    | 5.31E-06    | 7.07E-05    |
| mmu04142:Lysosome                                               | 34    | 5.63E-04    | 1.80952381      | 0.099514555 | 0.034337057 | 0.695527923 |
| mmu04510:Focal adhesion                                         | 48    | 0.001926039 | 1.535353535     | 0.301338299 | 0.085746284 | 2.359401667 |
| mmu05410:Hypertrophic cardiomyopathy (HCM)                      | 25    | 0.001983154 | 1.884920635     | 0.30873557  | 0.071185809 | 2.428580024 |
| mmu04810:Regulation of actin cytoskeleton                       | 50    | 0.004601206 | 1.459293395     | 0.57590561  | 0.133216928 | 5.551645387 |
| mmu00280:Valine, leucine and isoleucine degradation             | 15    | 0.009119711 | 2.065217391     | 0.818054551 | 0.216069947 | 10.72645197 |
| mmu04530:Tight junction                                         | 33    | 0.009772539 | 1.548148148     | 0.839045305 | 0.204137657 | 11.45216538 |
| mmu04920:Adipocytokine signaling pathway                        | 19    | 0.013535507 | 1.7960199       | 0.920722286 | 0.245457933 | 15.53060216 |
| mmu05414:Dilated cardiomyopathy                                 | 24    | 0.014045381 | 1.652173913     | 0.927990756 | 0.231331959 | 16.06973474 |
| mmu04666:Fc gamma R-mediated phagocytosis                       | 25    | 0.015808901 | 1.615646259     | 0.948385163 | 0.236200261 | 17.91015851 |
| mmu05416:Viral myocarditis                                      | 24    | 0.018093978 | 1.617021277     | 0.966503013 | 0.246499037 | 20.23970867 |
| mmu00604:Glycosphingolipid biosynthesis                         | 7     | 0.021105157 | 2.955555556     | 0.981080768 | 0.263022691 | 23.21671044 |
| mmu05210:Colorectal cancer                                      | 22    | 0.023742285 | 1.620155039     | 0.988545052 | 0.273297506 | 25.73964253 |
| mmu00480:Glutathione metabolism                                 | 15    | 0.027081582 | 1.826923077     | 0.993943593 | 0.288544619 | 28.82497616 |
| mmu00511:Other glycan degradation                               | 7     | 0.029370817 | 2.770833333     | 0.996092292 | 0.292876722 | 30.87154199 |
| mmu04512:ECM-receptor interaction                               | 21    | 0.030745987 | 1.602409639     | 0.996998108 | 0.289422467 | 32.07478509 |
| mmu04010:MAPK signaling pathway                                 | 54    | 0.035198094 | 1.290566038     | 0.99872504  | 0.309451408 | 35.8394682  |
| mmu05214:Glioma                                                 | 17    | 0.036692318 | 1.682291667     | 0.99904436  | 0.306465414 | 37.05933728 |
| mmu04910:Insulin signaling pathway                              | 31    | 0.037693063 | 1.422705314     | 0.999212351 | 0.300453429 | 37.86437415 |
| mmu04662:B cell receptor signaling pathway                      | 20    | 0.039696027 | 1.583333333     | 0.999465407 | 0.301459536 | 39.44727586 |
| mmu00240:Pyrimidine metabolism                                  | 23    | 0.040983177 | 1.517361111     | 0.99958344  | 0.297980786 | 40.44482842 |
| mmu05218:Melanoma                                               | 18    | 0.046575138 | 1.605633803     | 0.999859627 | 0.320028668 | 44.60572661 |
| mmu00230:Purine metabolism                                      | 34    | 0.046647958 | 1.371549894     | 0.999861607 | 0.309421453 | 44.6581025  |
| mmu04062:Chemokine signaling pathway                            | 38    | 0.056979307 | 1.322344322     | 0.999981763 | 0.353694435 | 51.6442983  |
| mmu05200:Pathways in cancer                                     | 62    | 0.068921457 | 1.215686275     | 0.999998296 | 0.400025363 | 58.70491074 |
| mmu05412:Arrhythmogenic right ventricular cardiomyopathy (ARVC) | 18    | 0.072807988 | 1.52            | 0.999999217 | 0.405932789 | 60.78975733 |
| mmu04664:Fc epsilon RI signaling pathway                        | 19    | 0.085617609 | 1.467479675     | 0.999999941 | 0.44820484  | 66.99558386 |
| mmu00760:Nicotinate and nicotinamide metabolism                 | 8     | 0.086108664 | 2.026666667     | 0.999999947 | 0.438711944 | 67.21443035 |
| mmu04144:Endocytosis                                            | 40    | 0.098097669 | 1.254125413     | 0.999999995 | 0.472783541 | 72.16093405 |
